# Supplementary material for: Modeling Cellular Response in Large-Scale Radiogenomic Databases to Advance Precision Radiotherapy
Source: Oxford University Press journal article supplement (doi:10.1158/0008-5472.can-19-0179), 2019-09-26
Supplement: 00085472can190179-sup-215473_3_supp_5755647_pxdn9w.xlsx [file 00085472can190179-sup-215473_3_supp_5755647_pxdn9w.xlsx]

## Sheet: Sheet1
Category		Breast	CNS	LargeInt	Endometrium	Oesophagus	Liver	Ovary	Lung	Skin	Pancreas	UpAero	UrTract	Stomach		number positive	Number negative
Degradation	Melatonin Degradation I	0.51621	0	0	0	0	0.491	0	0	0	0	0	0	0		2	0
Degradation	Nicotine Degradation III	0.50677	0	0	0	0	0	0	0	0	0	0	0	0		1	0
Degradation	Nicotine Degradation II	0.47768	0	0	0	0	0.47937	0	0	0	0	0	0	0		2	0
Degradation	Acetone Degradation I (to Methylglyoxal)	0.56795	0	0	0	0	0.52341	0	0	0	0	0	0	0		2	0
Degradation	Bupropion Degradation	0.56795	0	0	0	0	0.52341	0	0	0	0	0	0	0		2	0
Degradation	Superpathway of Melatonin Degradation	0.45676	0	0	0.46714	0	0.42937	0	0	0	0	0	0	0		3	0
Degradation	Heme Degradation	0.94957	0	0	0	0	0	0	0	0	0	0	0	0		1	0
Metabolism	Oxidative Phosphorylation	0.36353	0	0	0	0.55773	-0.41629	-0.4921	-0.4904	0.40614	0	0	-0.33063	0		3	4
Degradation	Anandamide Degradation	0.98513	0	0	0	0	0	0	0	0	0	0	0	0		1	0
Degradation	Œ≤-alanine Degradation I	0.97279	0	0	0	0	0	0	0	0	0	0	0	0		1	0
Biosynthesis	1D-myo-inositol Hexakisphosphate Biosynthesis II (Mammalian)	0.57782	0	0	0	0	0	0	0	0	0	0	0	0		1	0
Biosynthesis	D-myo-inositol (1,3,4)-trisphosphate Biosynthesis	0.57432	0	0	0	0	0	0	0	0	0	0	0	0		1	0
Biosynthesis	Stearate Biosynthesis I (Animals)	0.46566	0	0	0	0	0	0	0	0	0	0	0	0		1	0
Inflammation	Acute Phase Response Signaling	-0.34341	0	0	0	0	0.32455	0	0	-0.344	0	0	0	0		1	2
Inflammation	Agranulocyte Adhesion and Diapedesis	-0.39078	0.31742	0.38885	0.29676	-0.44117	0.43265	0	0.51916	-0.37148	-0.29913	-0.33894	0	0		5	5
Cell Junctions and Interactions	Agrin Interactions at Neuromuscular Junction	-0.42049	0	0	0	0	0	0	0	-0.4306	0	0	-0.3568	0		0	3
Immune Related	Altered T Cell and B Cell Signaling in Rheumatoid Arthritis	-0.48214	0.3681	0	0	-0.50187	0	0	0.53593	-0.45354	-0.43692	-0.50551	0	0		2	5
Cell Cycle, Division and Proliferation	Antiproliferative Role of Somatostatin Receptor 2	-0.39309	0	0	0	0	0	0	0	0	0	0	0	0		0	1
Cell Death	Apoptosis Signaling	-0.36998	0.30024	0	0	0	0	0	0	0	0	0	-0.39367	0		1	2
Cell Junctions and Interactions	Axonal Guidance Signaling	-0.35358	0	0	0.29087	0	0	0	0	0	0	0	-0.25638	0		1	2
Immune Related	B Cell Development	-0.60187	0	0	0	0	0	0	0.63148	0	0	0	0	0		1	1
Cell Signaling	BMP signaling pathway	-0.43198	0	0	0	0	0	0	0	0	0	0	-0.35829	0		0	2
Cell Signaling	Basal Cell Carcinoma Signaling	-0.47958	0	0	0	0	0	0	0	0	0	0.47667	0	0		1	1
Immune Related	CCR5 Signaling in Macrophages	-0.39784	0	0	0	0	0	0	0	0	0	0	-0.3613	0		0	2
Cell Cycle, Division and Proliferation	Cell Cycle: G2/M DNA Damage Checkpoint Regulation	-0.42438	0	-0.4695	-0.60275	0.4458	-0.55549	-0.52852	0	0	0	0	0	0		1	5
Cancer Specific Pathways	Colorectal Cancer Metastasis Signaling	-0.34818	0	0	0	0	0	0	0	0	0	0	-0.28396	0		0	2
Cell Junctions and Interactions	Communication between Innate and Adaptive Immune Cells	-0.41632	0	0	0	-0.47641	0	0	0.48238	-0.41794	-0.46639	-0.5387	0	0		1	5
Immune Related	Complement System	-0.57132	0	0	0	0	0.57585	0.54008	0	0	0	0	0	0		2	1
DNA Damage and Repair	DNA Double-Strand Break Repair by Homologous Recombination	-0.63874	0	0	-0.69994	0	-0.69752	0	0	0	0	0	0	0		0	3
Cell Death	Death Receptor Signaling	-0.3525	0.32712	0	-0.42296	0	0	0	0	-0.40331	0	0	0	0		1	3
Cell Signaling	Ephrin B Signaling	-0.41212	0	0	0	0	0	0	0	0	0	0	-0.36238	0		0	2
Cell Junctions and Interactions	Epithelial Adherens Junction Signaling	-0.39562	0.39718	0	0	0	0	0	0	-0.34211	0	0	-0.30668	0		1	3
Cellular Functions	Erythropoietin Signaling	-0.3796	0	0	0	0	0	0	0	0	0	0	0	0		0	1
Cellular Functions	Factors Promoting Cardiogenesis in Vertebrates	-0.4628	0	0	0	0	0	0	0	0	0	0	0	0		0	1
Cell Signaling	G Beta Gamma Signaling	-0.41387	0	0	0	0	0	0	0	0	0	0	-0.37716	0		0	2
Cell Signaling	G Protein Signaling Mediated by Tubby	-0.50415	0	0	0	0	0	0	0	0	0	0	-0.44997	0		0	2
Cell Junctions and Interactions	Gap Junction Signaling	-0.33657	0.29953	0	0	0	0	0	0	0	0	0	-0.27984	0		1	2
Cell Junctions and Interactions	Germ Cell-Sertoli Cell Junction Signaling	-0.31172	0.31487	0	0	-0.30252	0	0	0	0	0	0	-0.32518	0		1	3
Immune Related	Graft-versus-Host Disease Signaling	-0.51659	0.6408	0.63264	0	0	0	0	0.6015	0	0	-0.56739	0	0		3	2
Cell Junctions and Interactions	Granulocyte Adhesion and Diapedesis	-0.36994	0.31622	0.41505	0.30855	-0.4875	0.46237	0.30802	0.54059	-0.37215	-0.35122	-0.38354	0	0		6	5
Cellular Functions	HGF Signaling	-0.36959	0	0	0	0	0	0	0	0	0	0	-0.3256	0		0	2
Biosynthesis	Heparan Sulfate Biosynthesis (Late Stages)	-0.42779	0	0	0.42414	0	0	0	0	0	0	0	0	0		1	1
Cancer Specific Pathways	Hereditary Breast Cancer Signaling	-0.3379	0	-0.3804	-0.51821	0.42548	-0.4741	-0.45897	-0.4295	0	0.46253	0	-0.3471	0		2	7
Stem Cells	Human Embryonic Stem Cell Pluripotency	-0.3695	0	0	0	0	0	0	0	0	0	0.40391	0	0		1	1
Immune Related	IL-1 Signaling	-0.37719	0.33428	0	0	0	0	0	0	0	0	0	-0.37794	0		1	2
Immune Related	IL-6 Signaling	-0.34838	0.32151	0	0	0	0	0	0	-0.40849	0	0	0	0		1	2
Immune Related	IL-8 Signaling	-0.33674	0.27456	0	0	0	0	0	0	0	0	0	-0.33652	0		1	2
Cellular Functions	Inhibition of Matrix Metalloproteases	-0.48673	0.45896	0.55062	0	0	0.49028	0	0.61029	0	0	0	0	0		4	1
Immune Related	Interferon Signaling	-0.57757	0	0	0	-0.51036	0	0	0	0	0	0	0	0		0	2
Cell Signaling	JAK/Stat Signaling	-0.38038	0	0	0	0	0	0	0	0	0	0	-0.34597	0		0	2
Cell Junctions and Interactions	Leukocyte Extravasation Signaling	-0.34397	0.33286	0.30224	0.27774	-0.34855	0	0	0.32186	0	0	0	0	0		4	2
Cellular Functions	Macropinocytosis Signaling	-0.44505	0.37658	0	0	0	0	0	0	0	0	0	0	0		1	1
Cancer Specific Pathways	Molecular Mechanisms of Cancer	-0.3056	0	0	-0.26109	0	0	0	0	0	0	0	-0.24378	0		0	3
Stem Cells	Mouse Embryonic Stem Cell Pluripotency	-0.36685	0	0	0	0	0	0	0	0	0	0	0	0		0	1
Inflammation	NF-Œ∫B Signaling	-0.34904	0	0	0	0	0	0	0	-0.34434	0	0	-0.29138	0		0	3
Immune Related	Oncostatin M Signaling	-0.55474	0	0	0	0	0	0	0.49434	0	0	0	0	0		1	1
CANcer Specific Pathways	Ovarian Cancer Signaling	-0.40651	0	0	0	0.34732	0	0	0	0	0	0	0	0		1	1
Inflammation	PDGF Signaling	-0.41711	0	0	0	0	0	0	0	0	0	0	0	0		0	1
Cell Signaling	PEDF Signaling	-0.40169	0	0	0	0	0	0	0	-0.42196	0	0	0	0		0	2
Metabolism	PPAR Signaling	-0.38562	0	0	0	0	0	0	0.34135	-0.46053	0	0	0	0		1	2
Metabolism	PPARŒ±/RXRŒ± Activation	-0.33263	0.24508	0	0	0	0	0	0	-0.34833	0	0	0	0		1	2
Cell Junctions and Interactions	Paxillin Signaling	-0.3951	0.36316	0	0	-0.34828	0	0	0	0	0	0	0	0		1	2
Cell Signaling	Prolactin Signaling	-0.41673	0	0	0	0	0	0	0	0	0	0	0	0		0	1
Cell Signaling	Protein Kinase A Signaling	-0.27101	0	0	0	0	0	0	0	0	0	0	-0.24318	0		0	2
Cancer Specific Pathways	Regulation of the Epithelial-Mesenchymal Transition Pathway	-0.36577	0	0	0	0	0	0	0	0	0	0.35874	0	0		1	1
DNA Damage and Repair	Role of BRCA1 in DNA Damage Response	-0.45837	-0.44283	-0.53923	-0.65273	0.52969	-0.58063	-0.52541	-0.51534	0	0.50845	0	0	0		2	7
Immune Related	Role of JAK family kinases in IL-6-type Cytokine Signaling	-0.5127	0	0	0	0	0	0	0	0	0	0	0	0		0	1
Immune Related	Role of JAK1 and JAK3 in Œ≥c Cytokine Signaling	-0.43073	0	0	0	0	0	0	0	0	0	0	0	0		0	1
Immune Related	Role of JAK1, JAK2 and TYK2 in Interferon Signaling	-0.54862	0	0	0	0	0	0	0	0	0	0	0	0		0	1
Immune Related	Role of Macrophages, Fibroblasts and Endothelial Cells in Rheumatoid Arthritis	-0.35758	0	0	0	0	0	0	0.29997	-0.33872	0	0	0	0		1	2
Stem Cells	Role of NANOG in Mammalian Embryonic Stem Cell Pluripotency	-0.4398	0	0	0	0	0	0	0	0	0	0	0	0		0	1
Other	Role of NFAT in Cardiac Hypertrophy	-0.3294	0	0	0	0	0	0	0	0	0	0	-0.33118	0		0	2
Immune Related	Role of NFAT in Regulation of the Immune Response	-0.32824	0	0	0	0	0	0	0	0	0	0	-0.30033	0		0	2
Cellular Functions	Role of Osteoblasts, Osteoclasts and Chondrocytes in Rheumatoid Arthritis	-0.40932	0.30931	0	0	0	0	0	0.30064	-0.3258	0	0	0	0		2	2
Cell Signaling	STAT3 Pathway	-0.38545	0	0	0	0	0	0	0	0	0	0	0	0		0	1
Cell Junctions and Interactions	Sertoli Cell-Sertoli Cell Junction Signaling	-0.31175	0.29177	0	0	0	0	0	0	-0.33958	0	0	-0.30162	0		1	3
Immune Related	T Cell Receptor Signaling	-0.365	0	0	0	0	0	0	0	0	0	0	0	0		0	1
Immune Related	TNFR2 Signaling	-0.55102	0	0	0	0	0	0	0	0	0	0	0	0		0	1
Immune Related	TREM1 Signaling	-0.44692	0	0	0	-0.45949	0	0	0.42434	0	0	-0.38716	-0.44517	0		1	4
Cell Signaling	Tec Kinase Signaling	-0.38397	0.27532	0	0	0	0	0	0	0	0	0	0	0		1	1
Other	Thrombopoietin Signaling	-0.41246	0	0	0	0	0	0	0	0	0	0	0	0		0	1
Immune Related	Toll-like Receptor Signaling	-0.39525	0.35673	0	0	0	0	0	0.39161	-0.42807	0	-0.35458	0	0		2	3
Stem Cells	Transcriptional Regulatory Network in Embryonic Stem Cells	-0.49738	0	0	0	0	0	0	-0.48903	0	0	0	0	0		0	2
Cellular Functions	Type I Diabetes Mellitus Signaling	-0.37014	0.29659	0	0	0	0	0	0	0	0	0	-0.32691	0		1	2
Development	Wnt/Ca+ pathway	-0.42945	0	0	0	0	0	0	0	-0.43163	0	0	0	0		0	2
Immune Related	fMLP Signaling in Neutrophils	-0.35313	0.26767	0	0	0	0	0	0	0	0	0	-0.41642	0		1	2
Immune Related	Virus Entry via Endocytic Pathways	-0.37615	0.33027	0	0	-0.40423	0	0	0.34762	0	0	0	0	0		2	2
Cell Cycle, Division and Proliferation	Regulation of Cellular Mechanics by Calpain Protease	-0.41525	0.39566	0	0	0	0	0	0.47324	-0.44226	0	0	-0.42403	0		2	3
Cell Junctions and Interactions	Caveolar-mediated Endocytosis Signaling	-0.48765	0.49433	0	0	-0.42071	0	0	0.46639	0	0	0	0	0		2	2
Cancer Specific Pathways	Pancreatic Adenocarcinoma Signaling	-0.3318	0	0	-0.35723	0	0	0	0	0	0	0	0	0		0	2
Cancer Specific Pathways	Role of Tissue Factor in Cancer	-0.36427	0.32241	0	0	0	0	0	0.33867	0	0	0	-0.41789	0		2	2
Cytoskeleton	Actin Cytoskeleton Signaling	-0.34822	0.33041	0	0	0	0	0	0	0	0	0	-0.30211	0		1	2
Cell Signaling	Signaling by Rho Family GTPases	-0.30312	0	0	0	0	0	0	0	0	0	0	-0.29271	0		0	2
Cell Signaling	GŒ±i Signaling	-0.34572	0	0	0	0	0.3367	0	0	0	0	0	0	0		1	1
Cell Signaling	RhoGDI Signaling	-0.31383	0.28676	0	0	0	0	0	0	0	0	0	-0.31705	0		1	2
Cell Junctions and Interactions	Remodeling of Epithelial Adherens Junctions	-0.48387	0.47099	0	0	0	0	0	0	0	0	0	-0.41311	0		1	2
Cancer Specific Pathways	Bladder Cancer Signaling	-0.38057	0.33596	0	0	0	0	0	0.3442	0	0	0	0	0		2	1
Cell Signaling	Ephrin Receptor Signaling	-0.36816	0	0	0	0	0	0	0	0	0	0	-0.33683	0		0	2
Other	Hepatic Fibrosis / Hepatic Stellate Cell Activation	-0.42829	0.45944	0.41028	0.43772	-0.30213	0.38152	0.29137	0.4301	-0.38521	-0.27501	0	0	0		6	4
Immune Related	Antigen Presentation Pathway	-0.6786	0	0	0	0	0	0	0	0	0	0	0	0		0	1
Immune Related	Crosstalk between Dendritic Cells and Natural Killer Cells	0	0.41866	0	0	-0.43486	0	0	0.36604	0	0	0	0	0		2	1
Immune Related	IL-10 Signaling	0	0.3742	0	0	-0.38922	0	0	0.39281	-0.43197	0	0	0	0		2	2
Immune Related	Role of Hypercytokinemia/hyperchemokinemia in the Pathogenesis of Influenza	0	0.49191	0.52119	0	0	0	0	0.44336	-0.53361	0	-0.60517	0	0		3	2
Cytoskeleton	Regulation of Actin-based Motility by Rho	0	0.37697	0	0	-0.39139	0	0	0	0	0	0	-0.37046	0		1	2
Cell Cycle, Division and Proliferation	FAK Signaling	0	0.34154	0	0	0	0	0	0	0	0.46043	0	0	0		2	0
Cell Signaling	Œ±-Adrenergic Signaling	0	0.35544	0	0	0	0	0	0	0	0	0	0	0		1	0
Cell Signaling	IGF-1 Signaling	0	0.32296	0	0	0	0	0	0	0	0	0	-0.32488	0		1	1
Cell Cycle, Division and Proliferation	CDK5 Signaling	0	0.30712	0	0	0	0	0	0	0	0	0	0	0		1	0
Cell Signaling	Cdc42 Signaling	0	0.38182	0	0	0	0	0	0	0	0	0	-0.32345	0		1	1
Cellular functions	Atherosclerosis Signaling	0	0.30003	0.44684	0.32917	-0.37598	0.47262	0	0.46001	-0.38819	-0.35589	-0.3466	0.34781	0		6	4
Cellular functions	phagosome maturation	0	0.33323	0	0	0	0	0	0	0.36665	0	0	0	0		2	0
Cell Signaling	P2Y Purigenic Receptor Signaling Pathway	0	0.29416	0	0	0	0	0	0	0	0	0	-0.35096	0		1	1
Cell Signaling	RhoA Signaling	0	0.37519	0	0	0	0	0	0	0	0.42165	0	0	0		2	0
Immune Related	Role of IL-17A in Psoriasis	0	0.67321	0	0	0	0	0	0.73472	-0.69564	0	0	0	0		2	1
Cell Signaling	GPCR-Mediated Integration of Enteroendocrine Signaling Exemplified by an L Cell	0	0.33963	0	0	0	0	0	0	0	0	0	0	0		1	0
Immune Related	Dendritic Cell Maturation	0	0.29449	0	0	0	0	0	0	-0.34128	0	0	0	0		1	1
Cell Signaling	CXCR4 Signaling	0	0.27405	0	0	0	0	0	0	0	0	0	0	0		1	0
Cell Signaling	Cholecystokinin/Gastrin-mediated Signaling	0	0.32551	0	0	0	0	0	0	-0.36262	0	0	0	0		1	1
Other	Hepatic Cholestasis	0	0.29265	0	0	-0.30364	0	0	0.29447	-0.37603	0	-0.35497	0	0		2	3
Biosynthesis	GDP-glucose Biosynthesis	0	0.82603	0	0	0	0	0	0	0	0	0	0	0		1	0
Cytoskeleton	ILK Signaling	0	0.31198	0	0	0	0	0	0	-0.33023	0	0	-0.27289	0		1	2
Cell Signaling	PI3K Signaling in B Lymphocytes	0	0.28763	0	0	0	0	0	0	-0.35307	0	0	0	0		1	1
Immune Related	FcŒ≥ Receptor-mediated Phagocytosis in Macrophages and Monocytes	0	0.3108	0	0	0	0	0	0	0	0	0	0	0		1	0
Immune Related	IL-17 Signaling	0	0.33049	0	0	0	0	0	0	0	0	0	0	0		1	0
Cellular Functions	Clathrin-mediated Endocytosis Signaling	0	0.26452	0	0	0	0	0	0	0	0	0	0	0		1	0
Cytoskeleton	Actin Nucleation by ARP-WASP Complex	0	0.3832	0	0	0	0	0	0	0	0	0	-0.39604	0		1	1
Degradation	Glucose and Glucose-1-phosphate Degradation	0	0.77224	0	0	0	0	0	0	0	0	0	0	0		1	0
Cellular Functions	Thrombin Signaling	0	0.25638	0	0	0	0	0	0	0	0	0	0	0		1	0
Cell Signaling	Corticotropin Releasing Hormone Signaling	0	0.27149	0	0	0	0	0	0	0	0	0	0	0		1	0
Cell junctions and Interactions	Integrin Signaling	0	0.37103	0	0	-0.30781	0	0	0	0	0	0	-0.31209	0		1	2
Other	Renin-Angiotensin Signaling	0	0.27748	0	0	0	0	0	0	0	0	0	0	0		1	0
Immune Related	IL-17A Signaling in Gastric Cells	0	0.4937	0	0	0	0	0	0	0	0	0	0	0		1	0
Immune Related	Role of Cytokines in Mediating Communication between Immune Cells	0	0.36314	0	0	-0.51164	0	0	0.45795	-0.55859	-0.45896	-0.63359	0	0		2	4
Immune Related	HMGB1 Signaling	0	0.26322	0	0	0	0	0	0	-0.38232	0	0	-0.31719	0		1	2
Metabolism	Glycolysis I	0	0.48792	0	0	0	0	0	0	0	0	0	0	0		1	0
Cell Junctions and Interactions	Synaptic Long Term Potentiation	0	0.28291	0	0	0	0	0	0	0	0	0	0	0		1	0
Immune Related	IL-17A Signaling in Fibroblasts	0	0.41733	0	0	0	0	0	0	-0.54972	0	0	0	0		1	1
Other	Cardiac Hypertrophy Signaling	0	0.23188	0	0	0	0	0	0	0	0	0	-0.2881	0		1	1
DNA Replication	Assembly of RNA Polymerase I Complex	0	-0.75792	0	0	0.73412	0	0	0	0	0	0	0	0		1	1
Cell Signaling	EIF2 Signaling	0	-0.58982	0	0	0.45557	-0.52883	-0.38063	-0.35803	-0.42615	0	0	-0.56276	0		1	6
Immune Related	Granzyme A Signaling	0	-0.60434	0	0	0	0	0	0	0	0	0	0	0		0	1
Cellular Functions	Regulation of eIF4 and p70S6K Signaling	0	-0.45115	0	0	0.3591	-0.49051	-0.39545	0	-0.36019	0	0	-0.46584	0		1	5
Cell Signaling	mTOR Signaling	0	-0.35376	0	0	0	-0.40658	0	0	-0.33442	0	0	-0.35342	0		0	4
Degradation	Lysine Degradation II	0	-0.85314	0	0	0	0	0	0	0	0	0	0	0		0	1
Cellular Functions	DNA Methylation and Transcriptional Repression Signaling	0	-0.60241	0	0	0	0	0	-0.72415	0	0	0	0	0		0	2
Degradation	Phenylethylamine Degradation I	0	-0.8604	0	0	0	0	0	0	0	0	0	0	0		0	1
Cellular Functions	tRNA Charging	0	-0.64304	-0.59947	0	0.62594	-0.64868	-0.62357	-0.52038	0	0	0	0	0		1	5
Degradation	Methionine Degradation I (to Homocysteine)	0	-0.63689	0	0	0.64401	0	0	0	0	0	0	0	0		1	1
Degradation	Superpathway of Methionine Degradation	0	-0.59854	0	0	0.55028	0	0	-0.52884	0	0	0	0	0		1	2
Biosynthesis	Cysteine Biosynthesis III (mammalia)	0	-0.65797	0	0	0.62262	0	0	0	0	0	0	0	0		1	1
Cellular Functions	Cleavage and Polyadenylation of Pre-mRNA	0	-0.6876	0	0	0	0	0	0	0	0.74766	0	0	0		1	1
Cellular Functions	Coagulation System	0	0	0.50267	0.48271	0	0	0	0.51349	0	0	0	0	0		3	0
Cellular Functions	Estrogen Receptor Signaling	0	0	-0.38761	-0.38884	0.36664	-0.36544	-0.4599	-0.46193	0	0.40821	0	-0.31674	0		2	6
Degradation	Glycogen Degradation III	0	0	-0.71532	0	0	0	0	0	0	0	0	0	0		0	1
Cell Cycle, Division and Proliferation	Mitotic Roles of Polo-Like Kinase	0	0	-0.45632	-0.61834	0	-0.58295	-0.56173	0	0	0	0	-0.40069	0		0	5
Degradation	Protein Ubiquitination Pathway	0	0	-0.30731	-0.47132	0.3679	-0.32426	-0.42522	-0.30858	0	0	0	-0.30031	0		1	6
Cell Cycle, Division and Proliferation	Role of CHK Proteins in Cell Cycle Checkpoint Control	0	0	-0.48324	-0.67233	0.46287	-0.59597	-0.56584	-0.47444	0	0.48653	0	0	0		2	5
Biosynthesis	Superpathway of Inositol Phosphate Compounds	0	0	-0.31355	0	0	0	0	0	0	0	0	0	0		0	1
Cell Cycle, Division and Proliferation	Cell Cycle Control of Chromosomal Replication	0	0	-0.65253	-0.70592	0	-0.7315	-0.67962	-0.58125	0	0.5886	0	-0.47783	0		1	6
Cancer Specific Pathways	Chronic Myeloid Leukemia Signaling	0	0	-0.39641	-0.36412	0	-0.38023	0	0	0	0	0	-0.38162	0		0	4
Cell Signaling	AMPK Signaling	0	0	-0.38587	0	0	0	-0.42718	-0.38414	0	0	0	0	0		0	3
DNA Damage and Repair	ATM Signaling	0	0	-0.42952	-0.60912	0	-0.46325	0	0	0	0.52045	0	0	0		1	3
Cellular Stress	Mitochondrial Dysfunction	0	0	0	0	0.49603	-0.3381	-0.4536	-0.425	0	0.37508	0	-0.31662	0		2	4
DnA Damage and Repair	Mismatch Repair in Eukaryotes	0	0	0	-0.81752	0.67093	-0.73862	0	-0.68829	0	0	0	-0.58748	0		1	4
Metabolism	TCA Cycle II (Eukaryotic)	0	0	0	0	0.59495	0	-0.58963	0	0	0.59661	0	0	0		2	1
Other	Hypoxia Signaling in the Cardiovascular System	0	0	0	0	0.42716	0	0	0	0	0	0	-0.47961	0		1	1
Immune Related	IL-15 Production	0	0	0	0	-0.51384	0	0	0	0	0	0	0	0		0	1
Immune Related	Role of Pattern Recognition Receptors in Recognition of Bacteria and Viruses	0	0	0	0	-0.35581	0	0	0	0	0	0	0	0		0	1
Immune Related	T Helper Cell Differentiation	0	0	0	0.46167	-0.50818	0	0	0.47182	0	0	0	0	0		2	1
Cell Signaling	VDR/RXR Activation	0	0	0	0	-0.38674	0	0	0.41853	0	0	0	0	0		1	1
Other	phagosome formation	0	0	0	0	-0.36604	0	0	0	0	0	0	0	0		0	1
Cellular Functions	Sperm Motility	0	0	0	0.41051	0	0	0	0	0	0	0	0	0		1	0
Biosynthesis	Dermatan Sulfate Biosynthesis (Late Stages)	0	0	0	0.49368	0	0	0	0	0	0	0	0	0		1	0
Other	Cellular Effects of Sildenafil (Viagra)	0	0	0	0.33896	0	0	0	0	0	0	0	0	0		1	0
Biosynthesis	Chondroitin Sulfate Biosynthesis (Late Stages)	0	0	0	0.46438	0	0	0	0	0	0	0	0	0		1	0
Cell Signaling	GŒ±s Signaling	0	0	0	0.33422	0	0	0	0	0	0	0	0	0		1	0
Other	eNOS Signaling	0	0	0	0.3136	0	0	0	0	0	0	0	0	0		1	0
Immune Related	4-1BB Signaling in T Lymphocytes	0	0	0	-0.55688	0	0	0	0	-0.51194	0	0	0	0		0	2
Cell Signaling	April Mediated Signaling	0	0	0	-0.49402	0	0	0	0	0	0	0	0	0		0	1
DNA Replication	Assembly of RNA Polymerase II Complex	0	0	0	-0.54887	0	-0.48517	-0.5703	-0.5775	0	0.5243	0	-0.51975	0		1	5
Immune Related	B Cell Activating Factor Signaling	0	0	0	-0.51389	0	0	0	0	0	0	0	0	0		0	1
DNA Damage and Repair	BER pathway	0	0	0	-0.71177	0	0	-0.69404	0	0	0	0	0	0		0	2
Immune Related	CD40 Signaling	0	0	0	-0.40337	0	0	0	0	0	0	0	0	0		0	1
Cell Cycle, Division and Proliferation	Cyclins and Cell Cycle Regulation	0	0	0	-0.49477	0	-0.42287	-0.4861	0	0	0	0	-0.39568	0		0	4
Cellular Stress	GADD45 Signaling	0	0	0	-0.59848	0	0	0	0	0	0	0	0	0		0	1
Cell Signaling	Glucocorticoid Receptor Signaling	0	0	0	-0.32216	0	-0.30756	-0.34858	0	-0.31964	0	0	-0.32676	0		0	5
Cell Cycle, Division and Proliferation	HIPPO signaling	0	0	0	-0.39111	0	0	0	0	0	0	0	-0.34144	0		0	2
Cellular stress	NRF2-mediated Oxidative Stress Response	0	0	0	-0.3048	0	0	0	0	0	0	0	0	0		0	1
DNA Damage and Repair	Nucleotide Excision Repair Pathway	0	0	0	-0.59229	0	-0.57503	-0.63085	-0.56298	0	0.5724	0	0	0		1	4
Cell Signaling	PI3K/AKT Signaling	0	0	0	-0.33603	0	0	0	0	0	0	0	-0.31614	0		0	2
Cell Signaling	RAN Signaling	0	0	0	-0.73176	0	-0.76672	-0.67228	-0.62752	0	0	0	-0.74284	0		0	5
Cell Death	TNFR1 Signaling	0	0	0	-0.46581	0	0	0	0	-0.47315	0	0	-0.49094	0		0	3
Cell Signaling	TWEAK Signaling	0	0	0	-0.56892	0	0	0	0	-0.62778	0	0	-0.50083	0		0	3
Cellular Functions	Telomere Extension by Telomerase	0	0	0	-0.6901	0	0	0	0	0	0	0	0	0		0	1
Cellular Stress	Unfolded protein response	0	0	0	-0.43198	0	0	0	0.42366	0	0	0	0	0		1	1
Cell Cycle, Division and Proliferation	p53 Signaling	0	0	0	-0.37275	0	0	0	0	0	0.4524	0	0	0		1	1
Cancer Specific Pathways	Prostate Cancer Signaling	0	0	0	-0.38555	0	0	0	0	0	0	0	-0.3376	0		0	2
Cell Cycle, Division and Proliferation	Cell Cycle Regulation by BTG Family Proteins	0	0	0	-0.51863	0	-0.51055	-0.54361	0	0	0	0	0	0		0	3
Cellular functions	Telomerase Signaling	0	0	0	-0.37123	0	0	0	0	0	0	0	0	0		0	1
Cell Cycle, Division and Proliferation	Cell Cycle: G1/S Checkpoint Regulation	0	0	0	-0.49739	0	0	-0.45637	0	0	0	0	-0.4152	0		0	3
Cell Cycle, Division and Proliferation	Estrogen-mediated S-phase Entry	0	0	0	-0.66607	0	0	-0.57958	0	0	0.59928	0	0	0		1	2
Biosynthesis	Retinoate Biosynthesis I	0	0	0	0	0	0.62417	0	0	0	0	0	0	0		1	0
Cell Signaling	LXR/RXR Activation	0	0	0	0	0	0.47569	0	0.34038	-0.34244	-0.35766	-0.32772	0	0		2	3
Cell Signaling	FXR/RXR Activation	0	0	0	0	0	0.48729	0	0	0	0	-0.30869	0	0		1	1
Immune Related	LPS/IL-1 Mediated Inhibition of RXR Function	0	0	0	0	0	0.33926	0.26404	0.28348	0	0	0	0	0		3	0
Other	Intrinsic Prothrombin Activation Pathway	0	0	0	0	0	0.54566	0	0	0	0	0	0	0		1	0
Biosynthesis	Retinol Biosynthesis	0	0	0	0	0	0.48675	0	0	0	0	0	0	0		1	0
Biosynthesis	The Visual Cycle	0	0	0	0	0	0.64353	0	0	0	0	0	0	0		1	0
Biosynthesis	Estrogen Biosynthesis	0	0	0	0	0	0.47632	0	0	0	0	0	0.49565	0		2	0
DNA Damage and Repair	DNA damage-induced 14-3-3œÉ Signaling	0	0	0	0	0	-0.63301	-0.64247	0	0	0	0	0	0		0	2
Cell Signaling	Insulin Receptor Signaling	0	0	0	0	0	-0.39855	0	-0.38948	0	0	0	0	0		0	2
Biosynthesis	Pyrimidine Deoxyribonucleotides De Novo Biosynthesis I	0	0	0	0	0	-0.64204	0	0	0	0	0	-0.59801	0		0	2
Biosynthesis	Dermatan Sulfate Biosynthesis	0	0	0	0	0	0	0.3671	0	0	0	0	0	0		1	0
Cell Signaling	Androgen Signaling	0	0	0	0	0	0	-0.45348	-0.39739	0	0.40017	0	-0.42791	0		1	3
Immune Related	Granzyme B Signaling	0	0	0	0	0	0	-0.70449	0	0	0	0	0	0		0	1
Biosynthesis	Salvage Pathways of Pyrimidine Deoxyribonucleotides	0	0	0	0	0	0	-0.78004	0	0	0	0	0	0		0	1
Biosynthesis	Salvage Pathways of Pyrimidine Ribonucleotides	0	0	0	0	0	0	-0.43028	0	0	0	0	-0.34732	0		0	2
Biosynthesis	Inosine-5'-phosphate Biosynthesis II	0	0	0	0	0	0	-0.95158	0	0	0	0	0	0		0	1
Biosynthesis	Purine Nucleotides De Novo Biosynthesis II	0	0	0	0	0	0	-0.76869	-0.72316	0	0	0	0	0		0	2
Degradation	L-cysteine Degradation III	0	0	0	0	0	0	-0.98191	0	0	0	0	0	0		0	1
Degradation	Spermine and Spermidine Degradation I	0	0	0	0	0	0	0	0.95928	0	0	0	0	0		1	0
Degradation	Chondroitin Sulfate Degradation (Metazoa)	0	0	0	0	0	0	0	0.71223	0	0	0	0	0		1	0
Other	Airway Pathology in Chronic Obstructive Pulmonary Disease	0	0	0	0	0	0	0	0.85416	0	0	0	0	0		1	0
Degradation	Dermatan Sulfate Degradation (Metazoa)	0	0	0	0	0	0	0	0.70015	0	0	0	0	0		1	0
Cell Signaling	p38 MAPK Signaling	0	0	0	0	0	0	0	0.31947	-0.35848	0	-0.31811	0	0		1	2
Biosynthesis	Chondroitin and Dermatan Biosynthesis	0	0	0	0	0	0	0	0.80729	0	0	0	0	0		1	0
Cell Cycle, Division and Proliferation	CREB Signaling in Neurons	0	0	0	0	0	0	0	-0.37101	0	0	0	-0.2822	0		0	2
Metabolism	Mevalonate Pathway I	0	0	0	0	0	0	0	-0.67034	0	0	0	0	0		0	1
Cell Cycle, Division and Proliferation	Sonic Hedgehog Signaling	0	0	0	0	0	0	0	-0.52611	0	0	0	0	0		0	1
Biosynthesis	Superpathway of Cholesterol Biosynthesis	0	0	0	0	0	0	0	-0.68569	0	0	0	0	0		0	1
Biosynthesis	Superpathway of Geranylgeranyldiphosphate Biosynthesis I (via Mevalonate)	0	0	0	0	0	0	0	-0.71478	0	0	0	0	0		0	1
Degradation	Isoleucine Degradation I	0	0	0	0	0	0	0	-0.62165	0.64664	0	0	0	0		1	1
Biosynthesis	Cholesterol Biosynthesis I	0	0	0	0	0	0	0	-0.6846	0	0	0	0	0		0	1
Biosynthesis	Cholesterol Biosynthesis II (via 24,25-dihydrolanosterol)	0	0	0	0	0	0	0	-0.6846	0	0	0	0	0		0	1
Biosynthesis	Cholesterol Biosynthesis III (via Desmosterol)	0	0	0	0	0	0	0	-0.6846	0	0	0	0	0		0	1
Biosynthesis	Acetyl-CoA Biosynthesis III (from Citrate)	0	0	0	0	0	0	0	-0.99951	0	0	0	0	0		0	1
Biosynthesis	Phosphatidylethanolamine Biosynthesis II	0	0	0	0	0	0	0	0	0.84251	0	0	0	0		1	0
Degradation	2-oxobutanoate Degradation I	0	0	0	0	0	0	0	0	0.88848	0	0	0	0		1	0
Degradation	Valine Degradation I	0	0	0	0	0	0	0	0	0.62087	0	0	0	0		1	0
Biosynthesis	Phosphatidylcholine Biosynthesis I	0	0	0	0	0	0	0	0	0.83598	0	0	0	0		1	0
Cell Death	autophagy	0	0	0	0	0	0	0	0	0.47401	0	0	0	0		1	0
Immune Related	Activation of IRF by Cytosolic Pattern Recognition Receptors	0	0	0	0	0	0	0	0	-0.48676	0	0	0	0		0	1
Cell Signaling	RAR Activation	0	0	0	0	0	0	0	0	-0.30648	0	0	0	0		0	1
Immune Related	Role of IL-17A in Arthritis	0	0	0	0	0	0	0	0	-0.45777	0	0	-0.39073	0		0	2
Immune Related	Role of IL-17F in Allergic Inflammatory Airway Diseases	0	0	0	0	0	0	0	0	-0.46736	0	0	-0.4843	0		0	2
Immune Related	Role of PKR in Interferon Induction and Antiviral Response	0	0	0	0	0	0	0	0	-0.54385	0	0	0	0		0	1
Immune Related	Role of RIG1-like Receptors in Antiviral Innate Immunity	0	0	0	0	0	0	0	0	-0.54541	0	0	0	0		0	1
Cell Junctions and Interactions	Tight Junction Signaling	0	0	0	0	0	0	0	0	-0.31795	0	0	0	0		0	1
Stem Cells	Hematopoiesis from Pluripotent Stem Cells	0	0	0	0	0	0	0	0	0	-0.52145	0	0	0		0	1
Metabolism	TR/RXR Activation	0	0	0	0	0	0	0	0	0	0	0.43478	0	0		1	0
Immune Related	Differential Regulation of Cytokine Production in Intestinal Epithelial Cells by IL-17A and IL-17F	0	0	0	0	0	0	0	0	0	0	-0.6507	0	0		0	1
Immune Related	MIF-mediated Glucocorticoid Regulation	0	0	0	0	0	0	0	0	0	0	-0.49744	0	0		0	1
Other	Role of Lipids/Lipid Rafts in the Pathogenesis of Influenza	0	0	0	0	0	0	0	0	0	0	-0.67407	0	0		0	1
Inflammation	Eicosanoid Signaling	0	0	0	0	0	0	0	0	0	0	0	0.5005	0		1	0
Metabolism	Phospholipases	0	0	0	0	0	0	0	0	0	0	0	0.56504	0		1	0
Cellular Stress	Antioxidant Action of Vitamin C	0	0	0	0	0	0	0	0	0	0	0	0.36855	0		1	0
Degradation	Lactose Degradation III	0	0	0	0	0	0	0	0	0	0	0	0.8738	0		1	0
Cellular Functions	14-3-3-mediated Signaling	0	0	0	0	0	0	0	0	0	0	0	-0.32492	0		0	1
Cancer Specific Pathways	Acute Myeloid Leukemia Signaling	0	0	0	0	0	0	0	0	0	0	0	-0.37813	0		0	1
Immune Related	B Cell Receptor Signaling	0	0	0	0	0	0	0	0	0	0	0	-0.31149	0		0	1
Cancer Specific Pathways	Breast Cancer Regulation by Stathmin1	0	0	0	0	0	0	0	0	0	0	0	-0.27264	0		0	1
Immune Related	CD27 Signaling in Lymphocytes	0	0	0	0	0	0	0	0	0	0	0	-0.43546	0		0	1
Immune Related	CD28 Signaling in T Helper Cells	0	0	0	0	0	0	0	0	0	0	0	-0.35135	0		0	1
Cell Signaling	GNRH Signaling	0	0	0	0	0	0	0	0	0	0	0	-0.30824	0		0	1
Cell Signaling	Huntington's Disease Signaling	0	0	0	0	0	0	0	0	0	0	0	-0.30284	0		0	1
Immune Related	IL-15 Signaling	0	0	0	0	0	0	0	0	0	0	0	-0.3688	0		0	1
Immune Related	IL-3 Signaling	0	0	0	0	0	0	0	0	0	0	0	-0.34835	0		0	1
Immune Related	LPS-stimulated MAPK Signaling	0	0	0	0	0	0	0	0	0	0	0	-0.36349	0		0	1
Cell Death	Myc Mediated Apoptosis Signaling	0	0	0	0	0	0	0	0	0	0	0	-0.37913	0		0	1
Cell Signaling	NGF Signaling	0	0	0	0	0	0	0	0	0	0	0	-0.33862	0		0	1
Other	Neuroprotective Role of THOP1 in Alzheimer's Disease	0	0	0	0	0	0	0	0	0	0	0	-0.47655	0		0	1
Cell Signaling	PTEN Signaling	0	0	0	0	0	0	0	0	0	0	0	-0.35503	0		0	1
Immune Related	Regulation of IL-2 Expression in Activated and Anergic T Lymphocytes	0	0	0	0	0	0	0	0	0	0	0	-0.34244	0		0	1
Cellular Stress	SAPK/JNK Signaling	0	0	0	0	0	0	0	0	0	0	0	-0.35881	0		0	1
Cell Signaling	TGF-Œ≤ Signaling	0	0	0	0	0	0	0	0	0	0	0	-0.35592	0		0	1
Cancer Specific Pathways	Thyroid Cancer Signaling	0	0	0	0	0	0	0	0	0	0	0	-0.47704	0		0	1
Cellular functions	VEGF Signaling	0	0	0	0	0	0	0	0	0	0	0	-0.34265	0		0	1
Cell Junctions and Interactions	Neuregulin Signaling	0	0	0	0	0	0	0	0	0	0	0	-0.32517	0		0	1
Cell Signaling	ERK5 Signaling	0	0	0	0	0	0	0	0	0	0	0	-0.38014	0		0	1
Cell Junctions and Interactions	Rac Signaling	0	0	0	0	0	0	0	0	0	0	0	-0.38816	0		0	1
DNA Replication	Guanine and Guanosine Salvage I	0	0	0	0	0	0	0	0	0	0	0	-0.99287	0		0	1
