# Supplementary material for: Modeling Cellular Response in Large-Scale Radiogenomic Databases to Advance Precision Radiotherapy
Source: Oxford University Press journal article supplement (doi:10.1158/0008-5472.can-19-0179), 2019-09-26
Supplement: 00085472can190179-sup-215473_3_supp_5755648_pxdn9x.xlsx [file 00085472can190179-sup-215473_3_supp_5755648_pxdn9x.xlsx]

## Sheet: Supplementary Table 2
AUC Pathways									Alpha Pathways									Beta Pathways
	Name	Genes (tot)	Stat (dist.dir)	Genes (up)	Genes (down)	pval	FDR			Name	Genes (tot)	Stat (dist.dir)	Genes (up)	Genes (down)	pval	FDR			Name	Genes (tot)	Stat (dist.dir)	Genes (up)	Genes (down)	pval	FDR
575	Melatonin Degradation I	44	0.56173	32	12	0.00038153	0.0104396		93	EIF2 Signaling	148	0.43699	118	30	0.00015026	0.0226186		255	Protein Ubiquitination Pathway	232	0.34081	146	86	0.0001688	0.0110372
581	Nicotine Degradation II	48	0.55769	36	12	0.00039047	0.0104396		152	Hereditary Breast Cancer Signaling	121	0.41588	86	35	0.00015295	0.0226186		93	EIF2 Signaling	148	0.59897	121	27	0.00017394	0.0110372
137	Granulocyte Adhesion and Diapedesis	147	0.41552	103	44	0.00073206	0.0139903		272	Role of BRCA1 in DNA Damage Response	75	0.51657	52	23	0.00015906	0.0226186		265	Regulation of eIF4 and p70S6K Signaling	126	0.48638	89	37	0.0001755	0.0110372
566	Serotonin Degradation	51	0.47639	32	19	0.00079271	0.0139903		515	ATM Signaling	58	0.51982	43	15	0.00016391	0.0226186		105	Estrogen Receptor Signaling	116	0.44468	82	34	0.00017578	0.0110372
506	LPS/IL-1 Mediated Inhibition of RXR Function	195	0.40062	122	73	0.00085616	0.0143352		302	Sonic Hedgehog Signaling	28	0.68158	24	4	0.00017319	0.0226186		152	Hereditary Breast Cancer Signaling	121	0.39586	76	45	0.0001764	0.0110372
352	Xenobiotic Metabolism Signaling	241	0.27866	120	121	0.0022599	0.026352		443	Cell Cycle Control of Chromosomal Replication	27	0.63598	22	5	0.00034182	0.0283027		273	Role of CHK Proteins in Cell Cycle Checkpoint Control	53	0.54338	34	19	0.00018169	0.0110372
343	Unfolded protein response	51	0.41109	30	21	0.0031708	0.030449		445	DNA Methylation and Transcriptional Repression Signaling	20	0.67855	17	3	0.00034674	0.0283027		202	Mitotic Roles of Polo-Like Kinase	62	0.54556	43	19	0.00018282	0.0110372
28	Assembly of RNA Polymerase II Complex	43	-0.57106	13	30	0.00013554	0.00606678		202	Mitotic Roles of Polo-Like Kinase	62	0.44566	45	17	0.00049318	0.0322047		468	tRNA Charging	36	0.58147	31	5	0.00018352	0.0110372
71	Cyclins and Cell Cycle Regulation	76	-0.50439	22	54	0.00012642	0.00606678		71	Cyclins and Cell Cycle Regulation	76	0.41241	55	21	0.00079796	0.0398581		28	Assembly of RNA Polymerase II Complex	43	0.59242	35	8	0.00018529	0.0110372
93	EIF2 Signaling	148	-0.55712	27	121	0.00011616	0.00606678		32	Axonal Guidance Signaling	414	0.27259	246	168	0.0010521	0.0398581		443	Cell Cycle Control of Chromosomal Replication	27	0.67833	23	4	0.00018536	0.0110372
105	Estrogen Receptor Signaling	116	-0.52174	36	80	0.00012024	0.00606678		259	RAN Signaling	15	0.67393	11	4	0.0010669	0.0398581		200	Mismatch Repair in Eukaryotes	16	0.75312	16	0	0.00019084	0.0110372
125	Glucocorticoid Receptor Signaling	251	-0.36968	101	150	0.00010878	0.00606678		507	RhoGDI Signaling	168	0.32979	106	62	0.00131	0.0398581		316	Systemic Lupus Erythematosus Signaling	157	0.35716	91	66	0.00034518	0.0144137
152	Hereditary Breast Cancer Signaling	121	-0.48767	31	90	0.00011998	0.00606678		100	Epithelial Adherens Junction Signaling	137	0.3547	81	56	0.0013544	0.0398581		227	Oxidative Phosphorylation	90	0.42922	63	27	0.00035317	0.0144137
200	Mismatch Repair in Eukaryotes	16	-0.66491	3	13	0.0015307	0.0217293		200	Mismatch Repair in Eukaryotes	16	0.62886	14	2	0.0013906	0.0398581		259	RAN Signaling	15	0.74927	13	2	0.00038175	0.0146637
202	Mitotic Roles of Polo-Like Kinase	62	-0.57989	16	46	0.00013057	0.00606678		105	Estrogen Receptor Signaling	116	0.36724	77	39	0.001393	0.0398581		326	Telomere Extension by Telomerase	15	0.70985	11	4	0.00057263	0.0196804
259	RAN Signaling	15	-0.67435	3	12	0.0019875	0.0249584		265	Regulation of eIF4 and p70S6K Signaling	126	0.35551	89	37	0.0015017	0.0398581		360	mTOR Signaling	165	0.33327	99	66	0.00085955	0.0257225
265	Regulation of eIF4 and p70S6K Signaling	126	-0.47789	34	92	0.0001192	0.00606678		125	Glucocorticoid Receptor Signaling	251	0.29727	150	101	0.0015623	0.0398581		272	Role of BRCA1 in DNA Damage Response	75	0.43255	55	20	0.0008959	0.0257225
272	Role of BRCA1 in DNA Damage Response	75	-0.57981	12	63	0.00012602	0.00606678		24	Apoptosis Signaling	83	0.40243	57	26	0.001587	0.0398581		19	Androgen Signaling	105	0.37997	62	43	0.0012599	0.0315586
443	Cell Cycle Control of Chromosomal Replication	27	-0.69096	4	23	0.00014457	0.00606678		28	Assembly of RNA Polymerase II Complex	43	0.48623	29	14	0.0016554	0.0400362		547	Cleavage and Polyadenylation of Pre-mRNA	12	0.71265	12	0	0.0013311	0.0315586
445	DNA Methylation and Transcriptional Repression Signaling	20	-0.70718	2	18	0.00014865	0.00606678		137	Granulocyte Adhesion and Diapedesis	147	-0.30627	68	79	0.0012114	0.0398581		308	Superpathway of Cholesterol Biosynthesis	27	0.55397	21	6	0.0014829	0.0333908
515	ATM Signaling	58	-0.57593	11	47	0.00013247	0.00606678		277	Role of IL-17A in Psoriasis	12	-0.79851	4	8	0.00046653	0.0322047		56	Cell Cycle: G2/M DNA Damage Checkpoint Regulation	48	0.453	30	18	0.002199	0.0448733
190	MIF-mediated Glucocorticoid Regulation	29	0.52246	20	9	0.00033784	0.0104396		343	Unfolded protein response	51	-0.45112	17	34	0.00074832	0.0398581		311	Superpathway of Geranylgeranyldiphosphate Biosynthesis I (via Mevalonate)	16	0.64165	11	5	0.0026718	0.0498482
275	Role of Hypercytokinemia/hyperchemokinemia in the Pathogenesis of Influenza	35	0.49397	22	13	0.00035112	0.0104396		352	Xenobiotic Metabolism Signaling	241	-0.26976	124	117	0.0020597	0.0480351		32	Axonal Guidance Signaling	414	-0.24461	170	244	0.0013532	0.0315586
579	Nicotine Degradation III	42	0.56828	30	12	0.00037622	0.0104396		506	LPS/IL-1 Mediated Inhibition of RXR Function	195	-0.34353	92	103	0.00032352	0.0283027		178	Integrin Signaling	195	-0.29239	75	120	0.0026461	0.0498482
573	Superpathway of Melatonin Degradation	49	0.55833	35	14	0.00039968	0.0104396		543	Fatty Acid Œ±-oxidation	16	-0.65131	5	11	0.0009414	0.0398581		390	Thyroid Hormone Metabolism II (via Conjugation and/or Degradation)	24	-0.59786	5	19	0.00021404	0.0110372
108	FXR/RXR Activation	116	0.36376	77	39	0.00059347	0.0126971		566	Serotonin Degradation	51	-0.44113	21	30	0.00099776	0.0398581		430	Caveolar-mediated Endocytosis Signaling	64	-0.41711	22	42	0.0010839	0.0294911
30	Atherosclerosis Signaling	112	0.46553	78	34	0.00059453	0.0126971		575	Melatonin Degradation I	44	-0.46269	14	30	0.001506	0.0398581		506	LPS/IL-1 Mediated Inhibition of RXR Function	195	-0.3109	74	121	0.00072167	0.0235625
182	LXR/RXR Activation	114	0.4145	73	41	0.00060277	0.0126971		581	Nicotine Degradation II	48	-0.46542	14	34	0.00075949	0.0398581		507	RhoGDI Signaling	168	-0.31499	62	106	0.0016572	0.0349081
390	Thyroid Hormone Metabolism II (via Conjugation and/or Degradation)	24	0.5786	18	6	0.00063371	0.0129316											534	RhoA Signaling	115	-0.36382	36	79	0.000906	0.0257225
11	Acute Phase Response Signaling	156	0.3017	89	67	0.00077821	0.0139903											554	Hepatic Fibrosis / Hepatic Stellate Cell Activation	177	-0.41856	53	124	0.00023941	0.0111668
12	Agranulocyte Adhesion and Diapedesis	156	0.30593	102	54	0.00077821	0.0139903											566	Serotonin Degradation	51	-0.45369	15	36	0.0012934	0.0315586
554	Hepatic Fibrosis / Hepatic Stellate Cell Activation	177	0.34702	114	63	0.00083612	0.0143352											573	Superpathway of Melatonin Degradation	49	-0.50664	14	35	0.00044356	0.0160914
367	phagosome maturation	102	0.38792	55	47	0.0011111	0.0170904											575	Melatonin Degradation I	44	-0.50898	13	31	0.00021973	0.0110372
89	Dolichyl-diphosphooligosaccharide Biosynthesis	10	0.74248	8	2	0.0013387	0.0198675											579	Nicotine Degradation III	42	-0.46815	13	29	0.0023908	0.0473089
136	Graft-versus-Host Disease Signaling	25	0.54316	20	5	0.0016067	0.0218578											581	Nicotine Degradation II	48	-0.45001	15	33	0.0015402	0.033525
396	Eicosanoid Signaling	59	0.39296	35	24	0.0016771	0.0223499
176	Inhibition of Matrix Metalloproteases	34	0.49493	25	9	0.0017224	0.0224945
68	Complement System	32	0.51358	22	10	0.0020401	0.0251356
556	Coagulation System	34	0.48929	22	12	0.0024113	0.0267688
577	Estrogen Biosynthesis	34	0.47311	21	13	0.0024113	0.0267688
580	Noradrenaline and Adrenaline Degradation	33	0.45817	19	14	0.0024493	0.0267688
318	T Helper Cell Differentiation	53	0.40773	37	16	0.0024927	0.0267688
85	Dermatan Sulfate Degradation (Metazoa)	15	0.64506	12	3	0.0026004	0.0269534
522	Dopamine Degradation	21	0.55571	16	5	0.0031596	0.030449
430	Caveolar-mediated Endocytosis Signaling	64	0.3825	38	26	0.0034014	0.0317843
213	NRF2-mediated Oxidative Stress Response	171	0.27564	81	90	0.0034072	0.0317843
549	Retinoate Biosynthesis I	29	0.4825	21	8	0.0037162	0.0341786
582	Acetone Degradation I (to Methylglyoxal)	23	0.56654	16	7	0.0040049	0.0353405
583	Bupropion Degradation	23	0.56654	16	7	0.0040049	0.0353405
246	Phospholipases	51	0.39171	31	20	0.0051526	0.0442717
29	Assembly of RNA Polymerase III Complex	11	-0.70727	0	11	0.0039382	0.0353405
37	BMP signaling pathway	72	-0.43285	21	51	0.0025416	0.0267688
38	Basal Cell Carcinoma Signaling	66	-0.44296	25	41	0.0021938	0.0260464
56	Cell Cycle: G2/M DNA Damage Checkpoint Regulation	48	-0.51042	11	37	0.00067195	0.0132965
109	Factors Promoting Cardiogenesis in Vertebrates	87	-0.4231	32	55	0.0011254	0.0170904
139	Granzyme B Signaling	16	-0.69928	4	12	0.00045921	0.0111061
177	Insulin Receptor Signaling	124	-0.38696	41	83	0.0014228	0.0206464
203	Molecular Mechanisms of Cancer	352	-0.29683	131	221	0.0055573	0.0471288
205	Mouse Embryonic Stem Cell Pluripotency	90	-0.47206	29	61	0.00024612	0.00892869
221	Nucleotide Excision Repair Pathway	31	-0.54194	12	19	0.0021174	0.0256049
255	Protein Ubiquitination Pathway	232	-0.39462	71	161	0.00010977	0.00606678
266	Regulation of the Epithelial-Mesenchymal Transition Pathway	174	-0.36454	67	107	0.0010307	0.0165082
273	Role of CHK Proteins in Cell Cycle Checkpoint Control	53	-0.53066	13	40	0.00013167	0.00606678
316	Systemic Lupus Erythematosus Signaling	157	-0.36916	61	96	0.0010365	0.0165082
326	Telomere Extension by Telomerase	15	-0.72319	2	13	0.00045865	0.0111061
351	Wnt/Œ≤-catenin Signaling	160	-0.35936	67	93	0.0025198	0.0267688
360	mTOR Signaling	165	-0.39324	52	113	0.00022683	0.00871294
373	5-aminoimidazole Ribonucleotide Biosynthesis I	2	-0.99381	0	2	0.00037594	0.0104396
394	Cell Cycle Regulation by BTG Family Proteins	34	-0.51749	12	22	0.0040851	0.0355676
468	tRNA Charging	36	-0.62399	5	31	0.00013864	0.00606678
477	Chronic Myeloid Leukemia Signaling	88	-0.40718	27	61	0.0028399	0.0285301
492	Cell Cycle: G1/S Checkpoint Regulation	62	-0.44283	18	44	0.0027419	0.0279759
502	AMPK Signaling	168	-0.44988	48	120	0.00011338	0.00606678
504	Purine Nucleotides De Novo Biosynthesis II	10	-0.74277	3	7	0.0015957	0.0218578
535	Adipogenesis pathway	121	-0.40674	48	73	0.0004799	0.011192
557	Estrogen-mediated S-phase Entry	24	-0.57598	6	18	0.0030675	0.0303497
570	FGF Signaling	83	-0.42109	32	51	0.0017623	0.0225644
